# Supplementary material
Source: publisher figshare collection journal article supplement (https://gsapubs.figshare.com/ndownloader/files/22408731)
Supplement: Supplementary file 1 [file 22408731]

# WELLS\_Siletzia\_Table DR1\_Coccolith CP zones

| Field No.  | Date | Paleontologist Report by | Collected by       | County     | State | 30'x60'Quad   | Quad          | Scale | Latitude (North) | Longitude (Wes) | Location                        | Type of Sample | Lithology                                                | Formation                            | CP Zone                                         | GeolAge                           | Paleoecology/Bathymetry       | Species List & Relative Abundance                                                                                                                                                                                                               | Diversity                               | Remarks                      | Notes                            | References                |
|------------|------|--------------------------|--------------------|------------|-------|---------------|---------------|-------|------------------|-----------------|---------------------------------|----------------|----------------------------------------------------------|--------------------------------------|-------------------------------------------------|-----------------------------------|-------------------------------|-------------------------------------------------------------------------------------------------------------------------------------------------------------------------------------------------------------------------------------------------|-----------------------------------------|------------------------------|----------------------------------|---------------------------|
| W 83-15N   | 1983 | David Bukry              | Ray E. Wells       | Tillamook  | OR    | Nehalem River | Jordan Creek  | 24000 | 45.53633         | 123.55633       | SW SW sec. 28, T1N R7W          | outcrop        | siltstone                                                | Tyee Fm.?                            | CP 12b?                                         | Eocene                            |                               | assemblage resembles Rhabdosphaera a inflata Zone, but no R. inflata is present                                                                                                                                                                 | abundant, high diversity (15)           |                              | report dated 11/3/83             |                           |
| W 83-51    | 1983 | David Bukry              | Ray E. Wells       | Tillamook  | OR    | Nehalem River | Jordan Creek  | 24000 | 45.53650         | 123.55633       | SW SW sec. 28, T1N R7W          | outcrop        | basaltic sandstone                                       | Tyee Formation equivalent?           | resembles CP 12b                                | late early or early middle Eocene |                               | Coccolithus crassus Bramlette and Sullivan, C. magnicrassus Bukry, Helicospaera seminulum Bramlette and Sullivan; Braarudosphae ra bigelowii (Gran and Braarud), Discolithina plana (Bramlette and Sullivan), Zygrhablithus bijugatus Deffandre | diversity moderate (17 species)         | key discoasters are missing. | report dated 12/3/84             |                           |
| W 84-15    | 1984 | David Bukry              | Ray E. Wells       | Tillamook  | OR    | Yamhill River | Dovre Peak    | 24000 | 45.29633         | 123.55017       | SW NE sec. 21, T3S R7W          | outcrop        | thin-bedded very fine-grained mic. feldspathic sandstone | Tyee Fm.                             | CP 11 or CP 12                                  | late early Eocene                 | relatively shallow deposition |                                                                                                                                                                                                                                                 |                                         |                              |                                  |                           |
| Rarey #612 |      | David Bukry              | P. Rarey           | Clatsop    | OR    | Nehalem River | Hamlet        | 24000 | 45.80883         | 123.69583       | NE SW sec. 20, T. 4 N., R. 8 W. | outcrop        | siltstone                                                | Hamlet Fm.                           | CP 14a                                          | late-middle Eocene                |                               |                                                                                                                                                                                                                                                 |                                         |                              |                                  |                           |
| Rarey #620 |      | David Bukry              | P. Rarey           | Clatsop    | OR    | Nehalem River | Hamlet        | 24000 | 45.79867         | 123.69967       | NE NE sec. 29, T. 4 N., R. 8 W. | outcrop        | siltstone                                                | Hamlet Fm.                           | CP 14a                                          | Eocene                            |                               |                                                                                                                                                                                                                                                 |                                         |                              |                                  |                           |
| S 85-132   | 1985 | David Bukry              | P.D. Snaveley, Jr. | Yamhill    | OR    | Yamhill River | Gobblers Knob | 24000 | 45.48333         | 123.44883       | NW NE sec. 29, T. 1 S., R. 6 W. | outcrop        | siltstone                                                | Siltstone and basalt of Trask River  | CP 10/11 (10/24/85); CP 11 or CP 12a (11/24/87) | early Eocene                      |                               | Chiasmolithus grandis, C. solitus, Discoaster Iodoensis, Discoasteroide s kuepperi, Sphenolithus radians, Tribachiatus orthostylus                                                                                                              | moderately diverse                      |                              | reports dated 10/24/85, 11/24/87 | Bukry and Snaveley (1988) |
| W 85-42    | 1985 | David Bukry              | Ray E. Wells       | Washington | OR    | Yamhill River | Gobblers Knob | 24000 | 45.46067         | 123.45083       | NE NE sec. 29, T1S R6W          | outcrop        | siltstone                                                | Trask River beds (Umpqua-equivalent) | CP 10 or CP 11                                  | late early Eocene                 | shallow-water                 | large indicator species: Braarudosphae ra, Rhabdosphae ra, and Zygrhablithus; contains guide taxa Chiasmolithus grandis, Discoaster Iodoensis, D. kuepperi, and Tribachiatus orthostylus                                                        | moderately diverse                      | overgrown                    | report dated 10/24/85            |                           |
| W 86-14    | 1986 | David Bukry              | Ray E. Wells       | Tillamook  | OR    | Yamhill River | The Peninsula | 24000 | 45.49900         | 123.68517       | Trask River                     | outcrop        | siltstone                                                | Tyee Fm                              | CP 12b                                          | middle Eocene                     |                               | few coccoliths including Discoasteroide s kuepperi and Rhabdosphae ra inflata                                                                                                                                                                   |                                         |                              | report dated 1/16/87             |                           |
| W 86-16a   | 1986 | David Bukry              | Ray E. Wells       | Tillamook  | OR    | Nehalem River | Jordan Creek  | 24000 | 45.53717         | 123.57883       | SW SW sec. 29, T. 1 N., R. 7 W. | outcrop        | siltstone                                                | Tyee Formation equivalent?           | CP 11 to CP 12a                                 | Cenozoic                          |                               |                                                                                                                                                                                                                                                 | very sparse, nondiagnostic              |                              | report dated 1/16/87             |                           |
| W 86-16c   | 1986 | David Bukry              | Ray E. Wells       | Tillamook  | OR    | Nehalem River | Jordan Creek  | 24000 | 45.53717         | 123.57883       | SW SW sec. 29, T. 1 N., R. 7 W. | outcrop        | siltstone                                                | Tyee Formation equivalent?           | CP 11 or CP 12a                                 | early Eocene                      |                               | common coccoliths include Cyclicargolithu s gamma and Discoasteroide s kuepperi                                                                                                                                                                 | abundance (C)                           |                              | report dated 1/16/87             |                           |
| W 86-17    | 1986 | David Bukry              | Ray E. Wells       | Tillamook  | OR    | Nehalem River | Jordan Creek  | 24000 | 45.53717         | -123.56717      | SW SE sec. 29, T. 1 N., R. 7 W. | outcrop        | siltstone                                                | Tyee Formation equivalent?           | CP 11 or CP 12a                                 | early Eocene                      |                               | few coccoliths, fragmented. Contains Discoasteroide s kuepperi                                                                                                                                                                                  |                                         |                              | report dated 1/16/87             |                           |
| W 87-46A,B | 1987 | David Bukry              | Ray E. Wells       | Tillamook  | OR    | Yamhill River | Trask         | 24000 | 45.44950         | 123.54683       | SE SE sec. 28, T. 1 S., R. 7 W. | outcrop        | siltstone                                                | Siltstone and basalt of Trask River  | CP 11                                           | late early Eocene                 |                               | includes Discoaster Iodoensis, Discoasteroide s kuepperi, and Lophodolthis nascens, one Coccolithus crassus (n = 468)                                                                                                                           | meager assemblage                       |                              | report dated 11/5/87             |                           |
| W 87-46AX  | 1987 | David Bukry              | Ray E. Wells       | Tillamook  | OR    | Yamhill River | Trask         | 24000 | 45.44950         | 123.54683       | SE SE sec. 28, T. 1 S., R. 7 W. | outcrop        | siltstone                                                | Siltstone and basalt of Trask River  | CP 11                                           | early Eocene                      |                               | includes Coccolithus crassus, C. magnicrassus and Discoasteroide s kuepperi. No. Tribachiatus orthostylus. A few Braarudosphae ra bigelowii and Zygrhablithus bijugatus                                                                         | meager assemblage                       | moderately overgrown         | report dated 11/24/87            |                           |
| W 88-3     | 1988 | David Bukry              | Ray E. Wells       | Tillamook  | OR    | Yamhill River | Trask         | 24000 | 45.45067         | 123.60067       | Trask                           | outcrop        | siltstone                                                | Tyee Formation equivalent?           | CP 12b                                          | early middle Eocene               |                               | includes Rhabdosphae ra crebra, R. inflata; no discoasters                                                                                                                                                                                      | common, moderately overgrown assemblage |                              | report dated 12/1/88             |                           |
| W 88-4     | 1988 | David Bukry              | Ray E. Wells       | Tillamook  | OR    | Yamhill River | Blaine        | 24000 | 45.26717         | 123.70800       | Trask                           | outcrop        | siltstone                                                | Tyee Formation equivalent?           | CP 12b                                          | early middle Eocene               |                               | includes fairly numerous R. inflata with Chiasmolithus grandis, Cyclicargolithu s pseudogamma tion. No discoasters                                                                                                                              | common assemblage                       |                              | report dated 12/1/88             |                           |
| W 88-5     | 1988 | David Bukry              | Ray E. Wells       | Tillamook  | OR    | Yamhill River | Blaine        | 24000 | 45.26717         | 123.70800       | Nestucca R. area                | outcrop        | siltstone                                                | Tyee Formation equivalent?           | CP 12b                                          | early middle Eocene               |                               | few Reticulofenestr a dictyoda and Rhabdosphae ra inflata                                                                                                                                                                                       | common, fairly diverse assemblage       |                              | report dated 12/1/88             |                           |

## WELLS\_Siletzia\_Table 1\_Coccolith CP zones

| Field No.        | Date | Paleontologist Report by | Collected by      | County    | State | 30'x60'Quad   | Quad                | Scale | Latitude (North) | Longitude (Wes) | Location                                                               | Type of Sample | Lithology | Formation                            | CP Zone         | GeolAge                                                                         | Paleoecology/Bathymetry | Species List & Relative Abundance                                                                                                                                                                                                                          | Diversity                                                                                                                                          | Remarks                                                                         | Notes                          | References                        |
|------------------|------|--------------------------|-------------------|-----------|-------|---------------|---------------------|-------|------------------|-----------------|------------------------------------------------------------------------|----------------|-----------|--------------------------------------|-----------------|---------------------------------------------------------------------------------|-------------------------|------------------------------------------------------------------------------------------------------------------------------------------------------------------------------------------------------------------------------------------------------------|----------------------------------------------------------------------------------------------------------------------------------------------------|---------------------------------------------------------------------------------|--------------------------------|-----------------------------------|
| W 88-6           | 1988 | David Bukry              | Ray E. Wells      | Tillamook | OR    | Yamhill River | Blaine              | 24000 | 45.26717         | 123.70800       | Nestucca R. area                                                       | outcrop        | siltstone | Tyee Formation equivalent?           | CP 12b          | early middle Eocene                                                             |                         | with an R. inflata stem                                                                                                                                                                                                                                    | sparse, etched and fragmented assemblage                                                                                                           |                                                                                 | report dated 12/1/88           |                                   |
| W 88-18b         | 1988 | David Bukry              | Ray E. Wells      | Tillamook | OR    | Yamhill River | Dovre Peak          | 24000 | 45.26417         | 123.59417       |                                                                        | outcrop        | siltstone | Trask River beds (Umpqua-equivalent) | CP 11           | early Eocene                                                                    |                         | include key Coccolithus crassus and sparse Discoaster lodoensis and Discoasteroide s kuepperi                                                                                                                                                              | common coccoliths                                                                                                                                  |                                                                                 | report dated 12/1/88           |                                   |
| W 88-19a         | 1988 | David Bukry              | Ray E. Wells      | Tillamook | OR    | Yamhill River | Dovre Peak          | 24000 | 45.26417         | 123.59417       |                                                                        | outcrop        | siltstone | Trask River beds (Umpqua-equivalent) | CP 11           | early Eocene                                                                    |                         | sparse C. sp. cf. C. crassus and Discoaster lodoensis fragments                                                                                                                                                                                            | few etched coccoliths in calcareous coccolith hash                                                                                                 |                                                                                 | report dated 12/1/88           |                                   |
| W 88-26          | 1988 | David Bukry              | Ray E. Wells      | Tillamook | OR    | Yamhill River | Blaine              | 24000 | 45.44317         | 123.56550       | Nestucca R. area                                                       | outcrop        | siltstone | Trask River beds (Umpqua-equivalent) | CP 11           | early Eocene                                                                    |                         | contains D. lodoensis, D. kuepperi, and C. crassus                                                                                                                                                                                                         | common coccoliths                                                                                                                                  | moderately overgrown                                                            | report dated 12/1/88           |                                   |
| W 88-44b         | 1989 | David Bukry              | Ray E. Wells      | Tillamook | OR    | Yamhill River | Dovre Peak          | 24000 | 45.37250         | 123.55817       |                                                                        | outcrop        | siltstone | Trask River beds (Umpqua-equivalent) | CP 10 or CP 11  | early Eocene                                                                    |                         | assemblage includes C. grandis, C. gammatum, C. cf. magnicrassus, D. cf. lodoensis, and Discoasteroide s kuepperi                                                                                                                                          | meager, moderate diversity (13)                                                                                                                    | Placoliths are sparse and pentaliths missing.                                   | report dated 1/20/89           |                                   |
| EAR-11-88a       | 1989 | David Bukry              | Wells field asst. | Tillamook | OR    | Nehalem River | Jordan Creek        | 24000 | 45.60983         | 123.52567       | Wilson R. area                                                         | outcrop        | siltstone | Yamhill Fm.                          | CP 14a          | middle Eocene                                                                   |                         | common Cyclocarolithus pseudogammatum and sparse Chiasmolithus solitus and Discoaster sp. cf. D. bifax                                                                                                                                                     | low-diversity (10) assemblage includes Braarudosphaera bigelowii and Zygrholithus dubius                                                           |                                                                                 | report dated 1/20/89           |                                   |
| W 89-31a         | 1989 | David Bukry              | Ray E. Wells      | Pacific   | WA    | Astoria       | Upper Naselle River | 24000 | 46.45517         | 123.68083       | Upper Naselle River                                                    | outcrop        | siltstone | Yamhill Fm.                          | CP 13 or CP 14a | middle Eocene                                                                   |                         | Common Braarudosphaera crystallites with C. solitus and R. samodurovii (7 microns)                                                                                                                                                                         |                                                                                                                                                    |                                                                                 | report dated 12/27/89          |                                   |
| W 89-31b         | 1989 | David Bukry              | Ray E. Wells      | Pacific   | WA    | Astoria       | Upper Naselle River | 24000 | 46.45517         | 123.68083       | Upper Naselle River                                                    | outcrop        | siltstone | Yamhill Fm.                          | CP 13 or CP 14a | middle Eocene                                                                   |                         | Common Braarudosphaera crystallites with a few partial coccopheres. C. solitus is present.                                                                                                                                                                 |                                                                                                                                                    |                                                                                 | report dated 12/27/89          |                                   |
| W 89-37          | 1989 | David Bukry              | Ray E. Wells      | Pacific   | WA    | Astoria       | Upper Naselle River | 24000 | 46.47150         | 123.68650       | Upper Naselle River                                                    | outcrop        | siltstone | Yamhill Fm.                          | CP 14a          | middle Eocene                                                                   |                         | Chiasmolithus grandis, C. solitus, Reticulofenestra samodurovii (11 microns) and ?R. umbilica (>13 microns)                                                                                                                                                | large specimens and abundant placoliths                                                                                                            |                                                                                 | report dated 12/27/89          |                                   |
| W 92-200b        | 1992 | David Bukry              | Ray E. Wells      | Pacific   | WA    | Astoria       | Knappton            | 24000 | 46.25129         | 123.85813       | NE sec. 24, T9N R10W; Megler rest stop                                 | outcrop        | siltstone | Megler sandstone                     | CP 14b/ CP 15b  | latest middle Eocene to late Eocene                                             | shallow-water source    | sparse flora with C. reticulatum, R. umbilica, and shallow-water taxa Braarudosphaera, Pontosphaera, and Zygrholithus; plus C. pelagicus (12/2/92)                                                                                                         |                                                                                                                                                    | No Chiasmolithus solitus                                                        | report dated 12/2/92           |                                   |
| W 92-200c        | 1992 | David Bukry              | Ray E. Wells      | Pacific   | WA    | Astoria       | Knappton            | 24000 | 46.25129         | 123.85813       | NE sec. 24, T9N R10W; Megler rest stop                                 | outcrop        | siltstone | Megler sandstone                     | CP 14b/ CP 15b  | latest middle Eocene to late Eocene; middle Eocene to early Oligocene (12/2/92) | shallow-water source    | sparse flora includes C. reticulatum and R. umbilica (16 microns); plus Pemma, Braarudosphaera bigelowii, Transversopontis, questionable Criboecentrum reticulatum and Reticulofenestra hamdenensis (12/2/92); plus C. pseudogammatum,                     | (cont'd.) R. samodurovii (8 microns), R. sp. (circular) (3/11/93)                                                                                  |                                                                                 | reports dated 12/2/92/ 3/11/93 |                                   |
| WaW 92-2Na and c | 1992 | David Bukry              | Ray E. Wells      | Cowlitz   | WA    |               | Wildwood            | 24000 | 46.3805          | 123.0840        | Stillwater Creek                                                       | outcrop        | siltstone | McIntosh Formation                   | CP 14a          | late middle Eocene                                                              |                         | Braarudosphaera bigelowii                                                                                                                                                                                                                                  |                                                                                                                                                    | same disaggregated mode as reported in the Tillamook kerogen shale (OFR 93-623) |                                |                                   |
| W 94-5a          | 1994 | David Bukry              | Ray E. Wells      | Douglas   | OR    | Roseburg      | Sutherlin           | 24000 | 43.48000         | 123.34000       | NW NW sec. 19, T24S R5W; fresh roadcut on N side of ESE airport runway | outcrop        | siltstone | basin plain mudstone, Tenmile Fm.    | CP 11           | late-early Eocene                                                               |                         |                                                                                                                                                                                                                                                            |                                                                                                                                                    |                                                                                 |                                | Wells and others (2000), Table 2a |
| W 94-5b          | 1994 | David Bukry              | Ray E. Wells      | Douglas   | OR    | Roseburg      | Sutherlin           | 24000 | 43.48000         | 123.34000       | NW NW sec. 19, T24S R5W; fresh roadcut on N side of ESE airport runway | outcrop        | siltstone | basin plain mudstone, Tenmile Fm.    | CP 11           | late-early Eocene                                                               |                         | abundant flora includes Chiasmolithus grandis, Coccolithus crassus, Discoaster barbadiensis, D. lodoensis, Discoasteroide s kuepperi, Helicosphaera seminulum, Lophodolothus nascens, Micrantholithus aequalis, Pontosphaera pectinata, Rhadospaera a sp., | abundant and diverse flora - (cont'd): Sphenolithus radians, Transversopontis pulchroides, Tribracliatulus orthostylus, and Zygrholithus bijugatus |                                                                                 |                                | Wells and others (2000), Table 2a |
| W 95-9b          | 1995 | David Bukry              | Ray E. Wells      | Douglas   | OR    | Roseburg      | Roseburg East       | 24000 | 43.25000         | 123.35000       | NE sec. 61, T27S R6W                                                   | outcrop        | siltstone | Bushnell Rock Fm.                    | CP 10           | middle-early Eocene                                                             |                         |                                                                                                                                                                                                                                                            |                                                                                                                                                    |                                                                                 |                                | Wells and others (2000), Table 2a |

## WELLS\_Siletzia\_Table 1\_Coccolith CP zones

| Field No.   | Date | Paleontologist Report by | Collected by         | County    | State | 30'x60'Quad   | Quad          | Scale | Latitude (North) | Longitude (Wes) | Location                                                               | Type of Sample | Lithology | Formation                                                             | CP Zone         | GeolAge             | Paleoecology/ Bathymetry | Species List & Relative Abundance                                                                                                                   | Diversity                   | Remarks                                                                 | Notes | References                        |
|-------------|------|--------------------------|----------------------|-----------|-------|---------------|---------------|-------|------------------|-----------------|------------------------------------------------------------------------|----------------|-----------|-----------------------------------------------------------------------|-----------------|---------------------|--------------------------|-----------------------------------------------------------------------------------------------------------------------------------------------------|-----------------------------|-------------------------------------------------------------------------|-------|-----------------------------------|
| JW2 96-2908 | 1996 | David Bukry              | Ray E. Wells         | Tillamook | OR    | Nehalem River | Jordan Creek  | 24000 | 45.50313         | 123.60695       | SE SE sec. 1, T1S R8W                                                  | outcrop        | siltstone | Tyee Formation equivalent?                                            | CP 11 to CP 12a | late early Eocene   |                          | D. kuepperi, Chiasmolithus grandis, C. solitus, C. aff. crassus, D. barbadiensis, D. deflandrei, H. seminulum, S. radians, T. pulcher, Z. bigugatus |                             | no definitive D. lodoensis or C. crassus                                |       |                                   |
| N 96-2      | 1996 | David Bukry              | R.E. Wells/A.R. Niem | Columbia  | OR    | Nehalem River | Clear Creek   | 24000 | CLEAR CREEK      |                 |                                                                        | outcrop        | siltstone | Keasey Fm.                                                            | CP 15b/ CP 16b  | Eocene/Oligocene    |                          | Isthmolithus recurvus, Cyclocargolithus floridanus, Dict. scrippsae, Pontosphaera sp., Reticulofenestra umbilica (14 microns), Reticulofenestra sp. | diversity (7) abundance (F) | Isthmolithus recurvus is cold water guide to Eocene- Oligocene boundary |       |                                   |
| W 96-3      | 1996 | David Bukry              | Ray E. Wells         | Douglas   | OR    | Roseburg      | Tenmile       | 24000 | 43.11989         | 123.60184       | SW NW sec. 24, T28S R8W; interbed in pillow basalt, vertical in quarry | outcrop        | siltstone | turbidite sandstone & mudstone, Roseburg Mbr., Siletz River Volcanics | CP 10a          | middle-early Eocene |                          |                                                                                                                                                     |                             |                                                                         |       |                                   |
| W 96-4d     | 1996 | David Bukry              | Ray E. Wells         | Douglas   | OR    | Roseburg      | Garden Valley | 24000 | 43.33000         | 123.44000       | NW NW sec. 8, T26S R6W; E of Woodruff Mtn., Umpqua folds along highway | outcrop        | siltstone | mudstone & turbidite sandstone of Tenmile Fm.                         | CP 10/12        | late-early Eocene   |                          |                                                                                                                                                     |                             |                                                                         |       | Wells and others (2000), Table 2a |
| W 96-7d     | 1996 | David Bukry              | Ray E. Wells         | Douglas   | OR    | Roseburg      | Winchester    | 24000 | 43.35000         | 123.33000       | SE sec. 31, T25S R5W                                                   | outcrop        | siltstone | mudstone & turbidite sandstone of Tenmile Fm.                         | CP 10-late      | late-early Eocene   |                          |                                                                                                                                                     |                             |                                                                         |       | Wells and others (2000), Table 2a |
| W 96-8a-c   | 1996 | David Bukry              | Ray E. Wells         | Douglas   | OR    | Roseburg      | Winchester    | 24000 | 43.35000         | 123.33000       | SE sec. 31, T25S R5W                                                   | outcrop        | siltstone | mudstone & turbidite sandstone of Tenmile Fm.                         | CP 10-late      | late-early Eocene   |                          |                                                                                                                                                     |                             |                                                                         |       | Wells and others (2000), Table 2a |
| W 96-10a-d  | 1996 | David Bukry              | Ray E. Wells         | Douglas   | OR    | Roseburg      | Garden Valley | 24000 | 43.33000         | 123.44000       | SW sec. 5, T26S R6W                                                    | outcrop        | siltstone | mudstone & turbidite sandstone of Tenmile Fm.                         | CP 10/12        | late-early Eocene   |                          |                                                                                                                                                     |                             |                                                                         |       | Wells and others (2000), Table 2a |

Wells\_Table DR2 U-Pb TIMS ages, Tillamook Highlands, OR

| Sample # | Rock                                    | age             | Age interpretation                                                                  |
|----------|-----------------------------------------|-----------------|-------------------------------------------------------------------------------------|
| 01PH510A | Trask ash                               | 52.1 ± 0.8 Ma   | $^{206}\text{Pb}/^{238}\text{U}$ age of one concordant fraction                     |
| 01PH508A | Yamhill tuff                            | 46.47 ± 0.06 Ma | Weighted mean $^{206}\text{Pb}/^{238}\text{U}$ age<br>N=2, MSWD=0.01                |
| 01PH516A | Tillamook felsic flow along Trask River | 41.6 ± 0.4 Ma   | $^{206}\text{Pb}/^{238}\text{U}$ age of youngest concordant fraction                |
| 01PH503A | gabbro at Elk Creek                     | 35.6 ± 0.5 Ma   | Weighted mean $^{206}\text{Pb}/^{238}\text{U}$ age<br>N=3, MSWD=1.8, 95% confidence |

# Y GNNUa Vcdrg'F T5aU-Th-Pb isotopic data

| Sample                              | Compositional Parameters |      |       |      |                        |                    |                 |                 |                   | Radiogenic Isotope Ratios |                   |        |                   |        |                   |       |       | Isotopic Ages     |        |                   |       |                   |      |
|-------------------------------------|--------------------------|------|-------|------|------------------------|--------------------|-----------------|-----------------|-------------------|---------------------------|-------------------|--------|-------------------|--------|-------------------|-------|-------|-------------------|--------|-------------------|-------|-------------------|------|
|                                     | Wt.                      | U    | Th    | Pb   | <sup>206</sup> Pb*     | mol %              | Pb*             | Pb <sub>c</sub> | <sup>206</sup> Pb | <sup>208</sup> Pb         | <sup>207</sup> Pb | % err  | <sup>207</sup> Pb | % err  | <sup>206</sup> Pb | % err | corr. | <sup>207</sup> Pb | ± Ma   | <sup>207</sup> Pb | ± Ma  | <sup>206</sup> Pb | ± Ma |
|                                     | mg                       | ppm  | U     | ppm  | x10 <sup>-13</sup> mol | <sup>206</sup> Pb* | Pb <sub>c</sub> | (pg)            | <sup>204</sup> Pb | <sup>206</sup> Pb         | <sup>207</sup> Pb |        | <sup>238</sup> U  |        | <sup>238</sup> U  |       | coef. | <sup>206</sup> Pb |        | <sup>235</sup> U  |       | <sup>238</sup> U  |      |
| (a)                                 | (b)                      | (c)  | (d)   | (c)  | (e)                    | (e)                | (e)             | (e)             | (f)               | (g)                       | (g)               | (h)    | (g)               | (h)    | (g)               | (h)   |       | (i)               | (h)    | (i)               | (h)   | (i)               | (h)  |
| <b>Trask River ash 01PH510A</b>     |                          |      |       |      |                        |                    |                 |                 |                   |                           |                   |        |                   |        |                   |       |       |                   |        |                   |       |                   |      |
| A, 10,e                             | 0.011                    | 76   | 0.734 | 1.0  | 0.2812                 | 87.56%             | 2               | 3.53            | 130               | 0.233                     | 0.046463          | 18.154 | 0.052031          | 19.217 | 0.008122          | 1.462 | 0.745 | 21.74             | 435.48 | 51.50             | 9.65  | 52.14             | 0.76 |
| B, 20,s                             | 0.010                    | 422  | 0.295 | 7.6  | 2.5722                 | 94.73%             | 5               | 11.82           | 330               | 0.142                     | 0.073700          | 4.495  | 0.148746          | 4.838  | 0.014638          | 0.659 | 0.571 | 1033.26           | 90.80  | 140.80            | 6.36  | 93.68             | 0.61 |
| C,20,s                              | 0.009                    | 138  | 0.203 | 4.4  | 1.3853                 | 95.90%             | 7               | 5.10            | 408               | 0.111                     | 0.089764          | 1.362  | 0.330287          | 1.616  | 0.026686          | 0.708 | 0.550 | 1420.51           | 26.02  | 289.79            | 4.08  | 169.78            | 1.19 |
| D,6,abr                             | 0.009                    | 274  | 0.391 | 3.6  | 1.1798                 | 97.40%             | 12              | 2.40            | 669               | 0.159                     | 0.060727          | 10.129 | 0.096250          | 10.432 | 0.011495          | 1.022 | 0.341 | 629.57            | 218.13 | 93.31             | 9.30  | 73.68             | 0.75 |
| <b>Yamhill tuff 01PH508A</b>        |                          |      |       |      |                        |                    |                 |                 |                   |                           |                   |        |                   |        |                   |       |       |                   |        |                   |       |                   |      |
| A,2,abr                             | 0.012                    | 810  | 0.468 | 7.1  | 3.3812                 | 99.30%             | 42              | 1.98            | 2503              | 0.151                     | 0.047350          | 0.748  | 0.054562          | 0.844  | 0.008357          | 0.254 | 0.508 | 66.92             | 17.79  | 53.94             | 0.44  | 53.65             | 0.14 |
| B,8,abr                             | 0.030                    | 1492 | 0.690 | 11.9 | 13.4791                | 99.59%             | 75              | 4.70            | 4254              | 0.221                     | 0.046903          | 0.410  | 0.046784          | 0.474  | 0.007234          | 0.143 | 0.566 | 44.27             | 9.79   | 46.43             | 0.21  | 46.47             | 0.07 |
| C,9,s,abr                           | 0.009                    | 2439 | 0.664 | 20.3 | 6.8385                 | 99.16%             | 37              | 4.79            | 2181              | 0.215                     | 0.047447          | 1.508  | 0.048945          | 1.943  | 0.007482          | 1.150 | 0.632 | 71.81             | 35.83  | 48.52             | 0.92  | 48.05             | 0.55 |
| D,5,e,abr                           | 0.017                    | 383  | 0.914 | 3.4  | 1.9602                 | 97.78%             | 15              | 3.68            | 825               | 0.294                     | 0.046966          | 0.995  | 0.046843          | 1.079  | 0.007234          | 0.250 | 0.439 | 47.51             | 23.75  | 46.48             | 0.49  | 46.46             | 0.12 |
| E,25,abr                            | 0.044                    | 852  | 0.696 | 6.9  | 11.3301                | 99.47%             | 59              | 5.02            | 3441              | 0.224                     | 0.047070          | 0.189  | 0.047123          | 0.301  | 0.007261          | 0.179 | 0.809 | 52.79             | 4.50   | 46.75             | 0.14  | 46.64             | 0.08 |
| <b>Tilamook rhyolite 01PH516A</b>   |                          |      |       |      |                        |                    |                 |                 |                   |                           |                   |        |                   |        |                   |       |       |                   |        |                   |       |                   |      |
| A,4,e                               | 0.014                    | 165  | 0.950 | 1.6  | 0.6221                 | 92.06%             | 4               | 4.47            | 228               | 0.308                     | 0.047271          | 5.214  | 0.042152          | 5.465  | 0.006467          | 1.018 | 0.334 | 62.95             | 124.10 | 41.92             | 2.24  | 41.56             | 0.42 |
| B,5,r                               | 0.014                    | 396  | 0.226 | 12.3 | 5.5515                 | 92.15%             | 3               | 39.80           | 224               | 0.092                     | 0.063811          | 19.697 | 0.211107          | 21.337 | 0.023994          | 3.886 | 0.497 | 735.38            | 416.94 | 194.48            | 37.76 | 152.85            | 5.87 |
| C,7,r                               | 0.015                    | 188  | 0.632 | 4.9  | 2.5801                 | 97.37%             | 12              | 5.80            | 682               | 0.217                     | 0.052957          | 1.108  | 0.160351          | 1.223  | 0.021961          | 0.319 | 0.474 | 326.95            | 25.15  | 151.01            | 1.72  | 140.04            | 0.44 |
| D,9,s                               | 0.014                    | 353  | 0.248 | 15.8 | 8.7056                 | 99.66%             | 86              | 2.54            | 5007              | 0.128                     | 0.091492          | 0.219  | 0.533061          | 0.352  | 0.042257          | 0.224 | 0.798 | 1456.85           | 4.17   | 433.84            | 1.24  | 266.81            | 0.59 |
| E,4,s,r                             | 0.008                    | 180  | 0.581 | 11.5 | 3.4930                 | 99.03%             | 31              | 2.87            | 1813              | 0.185                     | 0.054375          | 1.589  | 0.437185          | 1.824  | 0.058313          | 0.703 | 0.505 | 386.60            | 35.69  | 368.27            | 5.64  | 365.36            | 2.50 |
| <b>Gabbro at Elk Creek 01PH503A</b> |                          |      |       |      |                        |                    |                 |                 |                   |                           |                   |        |                   |        |                   |       |       |                   |        |                   |       |                   |      |
| A,6,s                               | 0.012                    | 111  | 0.462 | 0.9  | 0.3045                 | 89.19%             | 2               | 3.05            | 162               | 0.149                     | 0.046868          | 14.405 | 0.035407          | 15.266 | 0.005479          | 1.163 | 0.758 | 42.52             | 344.03 | 35.33             | 5.30  | 35.22             | 0.41 |
| B,9,s                               | 0.012                    | 283  | 0.420 | 1.9  | 0.7832                 | 94.78%             | 5               | 3.59            | 343               | 0.136                     | 0.047018          | 5.092  | 0.035963          | 5.405  | 0.005548          | 0.621 | 0.546 | 50.13             | 121.45 | 35.88             | 1.91  | 35.66             | 0.22 |
| C,11,s                              | 0.011                    | 103  | 0.519 | 1.0  | 0.2606                 | 84.52%             | 2               | 4.02            | 114               | 0.171                     | 0.047878          | 17.386 | 0.036506          | 17.989 | 0.005530          | 1.313 | 0.488 | 93.24             | 411.33 | 36.41             | 6.43  | 35.55             | 0.46 |

(a) A, B etc. are labels for multigrain zircon fractions; number of grains listed after fraction name, and, abr - air abraded, e - elongate, s - stubby, r - rounded.

(b) Fraction weights have an estimated uncertainty of ±2 µg.

(c) U and total Pb concentrations subject to weighing uncertainty.

(d) Model Th/U ratio calculated from radiogenic <sup>208</sup>Pb/<sup>206</sup>Pb ratio and <sup>207</sup>Pb/<sup>235</sup>U age.

(e) Pb\* and Pb<sub>c</sub> represent radiogenic and common Pb, respectively; mol % <sup>206</sup>Pb\* with respect to radiogenic, blank and initial common Pb.

(f) Measured ratio corrected for spike and fractionation only. Mass discrimination of 0.37±0.05‰/amu based on analysis of NBS-981; all Daly analyses.

(g) Corrected for fractionation, spike, and common Pb; up to 11 pg of common Pb was assumed to be procedural blank: <sup>206</sup>Pb/<sup>204</sup>Pb = 17.4 ± 3.0%; <sup>207</sup>Pb/<sup>204</sup>Pb = 15.80 ± 3.0%; <sup>208</sup>Pb/<sup>204</sup>Pb = 36.4 ± 1.0% (1-sigma uncertainties). Excess over blank was assigned to initial common Pb with Stacey-Kramers model Pb composition at the interpreted age or <sup>207</sup>Pb/<sup>206</sup>Pb age of the fraction.

Stacey and Kramers, 1975.

(h) Errors are 2-sigma, propagated using the algorithms of Schmitz and Schoene (2007) and Crowley et al. (2007).

(i) Calculations are based on the decay constants of Jaffey et al. (1971). <sup>206</sup>Pb/<sup>238</sup>U and <sup>207</sup>Pb/<sup>206</sup>Pb ages corrected for initial disequilibrium in <sup>230</sup>Th/<sup>238</sup>U using Th/U [magma] = 3.

(j) Corrected for fractionation, spike, and blank Pb only.

| Spot Name                                     | %<br>comm<br>206 | ppm<br>U | ppm<br>Th | 232Th<br>/238U | 207corr<br>206Pb<br>/238U<br>Age, Ma | 1s<br>err | Total<br>238<br>/206 | %<br>err | Total<br>207<br>/206 | %<br>err |
|-----------------------------------------------|------------------|----------|-----------|----------------|--------------------------------------|-----------|----------------------|----------|----------------------|----------|
| SRV rhyolite ash flow                         |                  |          |           |                |                                      |           |                      |          |                      |          |
| 286-1.1                                       | 7.90             | 54       | 20        | 0.37           | 45.3                                 | 1.6       | 130.66               | 3.2      | .1095                | 7.3      |
| 286-2.1                                       | 4.77             | 108      | 51        | 0.49           | 46.6                                 | 1.1       | 131.29               | 2.3      | .0847                | 6.0      |
| 286-3.1                                       | 4.52             | 100      | 76        | 0.79           | 48.1                                 | 1.2       | 127.41               | 2.3      | .0827                | 5.9      |
| 286-4.1                                       | 21.91            | 62       | 43        | 0.72           | 45.9                                 | 2.2       | 109.24               | 2.7      | .2204                | 4.7      |
| 286-5.1                                       | 4.19             | 112      | 88        | 0.81           | 49.8                                 | 1.1       | 123.58               | 2.1      | .0802                | 5.5      |
| 286-6.1                                       | 6.57             | 89       | 43        | 0.50           | 54.3                                 | 1.6       | 110.37               | 2.5      | .0992                | 8.7      |
| 286-6.2                                       | 4.16             | 119      | 93        | 0.81           | 48.9                                 | 1.2       | 125.97               | 2.0      | .0799                | 11.6     |
| 286-7.1                                       | 9.86             | 52       | 20        | 0.41           | 44.4                                 | 1.8       | 130.48               | 3.2      | .1249                | 11.8     |
| 286-7.2                                       | 9.36             | 45       | 24        | 0.55           | 48.8                                 | 1.9       | 119.17               | 3.5      | .1211                | 8.3      |
| 286-8.1                                       | 4.50             | 111      | 86        | 0.80           | 46.3                                 | 1.2       | 132.49               | 2.4      | .0825                | 7.3      |
| 286-8.2                                       | 2.33             | 101      | 61        | 0.62           | 49.2                                 | 1.3       | 127.46               | 2.6      | .0654                | 7.4      |
| 286-9.1                                       | 2.92             | 72       | 53        | 0.76           | 48.6                                 | 1.5       | 128.30               | 2.8      | .0701                | 11.8     |
| 286-9.2                                       | 2.73             | 64       | 35        | 0.57           | 50.7                                 | 1.5       | 123.13               | 2.9      | .0686                | 9.0      |
| 286-10.1                                      | 2.76             | 71       | 48        | 0.70           | 49.5                                 | 1.4       | 126.09               | 2.8      | .0688                | 8.5      |
| 286-11.1                                      | 4.04             | 72       | 36        | 0.52           | 49.2                                 | 1.6       | 125.33               | 2.9      | .0790                | 11.8     |
| 286-12.1                                      | 7.70             | 62       | 31        | 0.51           | 44.3                                 | 1.5       | 133.99               | 3.1      | .1078                | 8.0      |
| 286-13.1                                      | 0.71             | 176      | 113       | 0.66           | 48.4                                 | 0.9       | 131.67               | 1.8      | .0526                | 7.8      |
| 286-14.1                                      | 2.63             | 144      | 82        | 0.58           | 45.8                                 | 1.0       | 136.65               | 2.0      | .0677                | 6.6      |
| weighted average (10 meas., excluding yellow) |                  |          |           |                | 49.0                                 | 0.8       |                      |          |                      |          |
| Grays R. Vol. pluton                          |                  |          |           |                |                                      |           |                      |          |                      |          |
| 294-1.1                                       | 6.40             | 79       | 47        | 0.61           | 40.8                                 | 1.3       | 147.48               | 2.9      | .0975                | 7.6      |
| 294-2.1                                       | 1.48             | 135      | 98        | 0.75           | 40.5                                 | 0.9       | 156.18               | 2.2      | .0585                | 8.0      |
| 294-3.1                                       | 2.02             | 150      | 114       | 0.79           | 42.2                                 | 1.0       | 149.31               | 2.1      | .0628                | 11.0     |
| 294-4.1                                       | 7.03             | 87       | 49        | 0.58           | 39.5                                 | 1.2       | 151.40               | 2.8      | .1024                | 7.6      |
| 294-5.1                                       | 6.14             | 57       | 27        | 0.49           | 38.5                                 | 1.6       | 156.67               | 3.7      | .0954                | 13.0     |
| 294-6.1                                       | 6.71             | 51       | 29        | 0.58           | 37.7                                 | 1.4       | 158.93               | 3.5      | .0999                | 9.3      |
| 294-7.1                                       | 4.43             | 86       | 56        | 0.66           | 38.8                                 | 1.1       | 158.35               | 2.7      | .0819                | 8.4      |
| 294-8.1                                       | 2.25             | 111      | 67        | 0.62           | 41.4                                 | 1.0       | 151.55               | 2.3      | .0646                | 7.9      |
| 294-9.1                                       | 4.63             | 66       | 37        | 0.57           | 38.2                                 | 1.3       | 160.46               | 3.1      | .0834                | 9.6      |
| 294-10.1                                      | 0.49             | 283      | 338       | 1.24           | 41.7                                 | 0.6       | 153.41               | 1.5      | .0507                | 5.6      |
| 294-11.1                                      | 1.14             | 121      | 77        | 0.66           | 39.9                                 | 0.9       | 159.23               | 2.2      | .0558                | 8.2      |
| 294-12.1                                      | 0.91             | 294      | 324       | 1.14           | 40.7                                 | 0.6       | 156.59               | 1.4      | .0540                | 5.6      |
| 294-13.1                                      | 1.09             | 246      | 240       | 1.01           | 37.0                                 | 0.7       | 171.98               | 1.8      | .0554                | 5.7      |
| 294-14.1                                      | 1.00             | 192      | 173       | 0.93           | 40.1                                 | 0.8       | 158.72               | 2.0      | .0547                | 6.4      |
| 294-15.1                                      | 5.60             | 1587     | 840       | 0.55           | 39.0                                 | 0.8       | 155.59               | 1.7      | .0911                | 7.7      |
| 294-16.1                                      | 2.14             | 121      | 88        | 0.75           | 37.6                                 | 1.0       | 167.20               | 2.6      | .0637                | 9.8      |
| weighted average                              |                  |          |           |                | 40.0                                 | 1.0       |                      |          |                      |          |

JW96- 286 Siletz R. Vol. Rhyolite

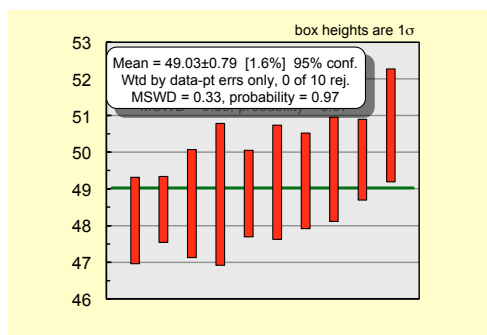

JW 96-294 Grays River Qtz monzonite

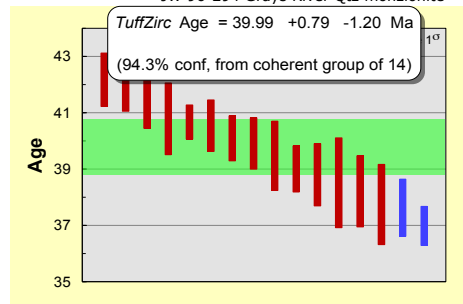

Table DR5 SHRIMP Detrital Zircon U-Pb ages page1

|                     |       | %<br>corr<br>206 | ppm<br>U | ppm<br>Th | 232Th<br>/238U | 204corr<br>206Pb<br>/238U<br>Age | 1s<br>err | 207corr<br>207Pb<br>/238U<br>Age | 1s<br>err | 204corr<br>207Pb<br>/206Pb<br>Age | 1s<br>err | Best Age | 1s<br>err | Total<br>238<br>/206<br>% | %<br>err | Total<br>207<br>/206<br>% | %<br>err | 238r<br>/206r<br>% | %<br>err | 207r<br>/206r<br>% | %<br>err | 207r<br>/238r<br>% | %<br>err | 206r<br>/238r<br>% | %<br>err | err<br>corr |
|---------------------|-------|------------------|----------|-----------|----------------|----------------------------------|-----------|----------------------------------|-----------|-----------------------------------|-----------|----------|-----------|---------------------------|----------|---------------------------|----------|--------------------|----------|--------------------|----------|--------------------|----------|--------------------|----------|-------------|
| Tyee Fm Coquille R. |       |                  |          |           |                |                                  |           |                                  |           |                                   |           |          |           |                           |          |                           |          |                    |          |                    |          |                    |          |                    |          |             |
| 437-1.1             | -0.76 | 613              | 390      | 0.66      | 2615.9         | 19.5                             | 2633.1    | 26.8                             | 2564      | 8                                 | 2564      | 8        | 2.00      | 0.9                       | 1711     | 0.5                       | 2.00     | 0.9                | 1707     | 0.5                | 1178     | 1.0                | 5005     | 0.9                | 881      |             |
| 437-2.1             | 1.24  | 210              | 39       | 0.36      | 179.4          | 5.9                              | 187.6     | 4.9                              | 187.6     | 4.9                               | 187.6     | 4.9      | 33.44     | 2.6                       | 0598     | 5.9                       | 35.43    | 3.4                |          |                    | 0282     |                    | 3.4      |                    |          |             |
| 437-3.1             | 0.97  | 112              | 83       | 0.40      | 172.8          | 3.3                              | 172.4     | 2.9                              | 172.4     | 2.9                               | 172.4     | 2.9      | 36.54     | 1.6                       | 0572     | 7.4                       | 36.80    | 1.9                | 0515     | 17.9               | 0.19     | 18.0               | 0272     | 1.9                | 107      |             |
| 437-4.1             | 0.15  | 161              | 161      | 0.29      | 149.9          | 2.1                              | 152.1     | 1.8                              |           |                                   | 152.1     | 1.8      | 41.83     | 1.2                       | 0503     | 2.6                       | 42.81    | 1.2                | 0374     | 16.9               | 0.12     | 16.9               | 0235     | 1.4                | 084      |             |
| 437-5.1             | 0.70  | 276              | 310      | 1.16      | 50.6           | 1.6                              | 51.5      | 1.2                              | 51.5      | 1.2                               | 51.5      | 1.2      | 123.74    | 2.2                       | 0528     | 6.1                       | 126.91   | 3.1                | 0326     | 56.0               | 0.04     | 56.1               | 0079     | 3.1                | 056      |             |
| 437-6.1             | 0.23  | 884              | 206      | 0.24      | 85.7           | 1.2                              | 86.6      | 1.1                              |           |                                   | 86.6      | 1.1      | 73.75     | 1.2                       | 0496     | 2.7                       | 74.75    | 1.4                | 0389     | 14.9               | 0.07     | 15.0               | 0134     | 1.4                | 095      |             |
| 437-7.1             | 5.09  | 670              | 113      | 0.17      | 424.4          | 4.1                              | 463.7     | 4.7                              | 1537      | 20                                | 1537      | 20       | 14.68     | 1.0                       | 0599     | 1.0                       | 14.69    | 1.0                | 0594     | 1.0                | 1.4      | 0.90               | 0681     | 1.0                | 683      |             |
| 437-8.1             | 1.39  | 191              | 27       | 0.28      | 212.7          | 5.1                              | 213.6     | 4.5                              | 213.6     | 4.5                               | 213.6     | 4.5      | 29.26     | 2.1                       | 0615     | 4.5                       | 29.81    | 2.4                | 0469     | 21.7               | 0.22     | 21.8               | 0336     | 2.4                | 111      |             |
| 437-10.1            | 2.85  | 121              | 64       | 0.55      | 42.6           | 2.1                              | 46.8      | 1.6                              |           |                                   | 46.8      | 1.6      | 134.03    | 3.4                       | 0695     | 8.2                       | 150.78   | 4.8                |          |                    | 0066     |                    | 4.8      |                    |          |             |
| 437-11.1            | 4.89  | 104              | 100      | 1.00      | 42.6           | 4.0                              | 46.0      | 1.7                              |           |                                   | 132.92    | 3.5      | 0856      | 6.4                       | 151.00   | 9.5                       |          |                    |          |                    | 0066     |                    | 9.5      |                    |          |             |
| 437-12.1            | 3.89  | 62               | 39       | 0.64      | 1398.2         | 27.7                             | 1341.5    | 39.1                             | 2021      | 242                               | 2021      | 242      | 4.15      | 2.2                       | 1193     | 14.1                      | 4.15     | 2.2                | 1244     | 13.7               | 4.16     | 13.8               | 2422     | 2.2                | 159      |             |
| 437-13.1            | 0.04  | 185              | 284      | 1.59      | 1772.3         | 17.9                             | 1770.8    | 20.1                             | 1785      | 17                                | 1785      | 17       | 3.16      | 1.2                       | 1086     | 0.9                       | 3.16     | 1.2                | 1091     | 1.0                | 4.76     | 15.3               | 3164     | 1.2                | 771      |             |
| 437-14.1            | 0.97  | 1864             | 191      | 0.11      | 1225.6         | 9.5                              | 1215.9    | 10.0                             | 1385      | 7                                 | 1385      | 7        | 4.78      | 0.9                       | 0981     | 0.3                       | 4.78     | 0.9                | 0981     | 0.4                | 2.54     | 0.9                | 2094     | 0.9                | 918      |             |
| 437-15.1            | 2.41  |                  |          | 0.50      | 127.2          | 3.9                              | 121.7     | 3.5                              |           |                                   | 121.7     | 3.5      | 48.98     | 2.7                       | 1064     | 3.3                       | 50.19    | 3.1                | 0864     | 15.0               | 0.24     | 15.3               | 0199     | 3.1                | 203      |             |
| 437-16.1            | -1.90 | 279              | 85       | 0.32      | 53.7           | 1.6                              | 52.4      | 1.4                              |           |                                   | 52.4      | 1.4      | 121.73    | 2.7                       | 0523     | 6.2                       | 119.46   | 2.9                | 0684     | 15.3               | 0.28     | 15.5               | 0084     | 2.9                | 189      |             |
| 437-17.1            | 4.44  | 692              | 444      | 0.67      | 1498.0         | 24.1                             | 1508.4    | 26.4                             |           |                                   | 1374      | 12       | 3.82      | 1.8                       | 0890     | 0.5                       | 3.82     | 1.8                | 0876     | 0.6                | 3.16     | 1.9                | 2516     | 1.8                | 945      |             |
| 437-18.1            | 4.26  | 143              | 75       | 0.54      | 48.6           | 2.3                              | 50.3      | 1.8                              |           |                                   | 50.3      | 1.8      | 126.59    | 3.5                       | 0548     | 17.8                      | 132.22   | 4.7                |          |                    | 0076     |                    | 4.7      |                    |          |             |
| 437-19.1            | 0.22  | 227              | 92       | 0.42      | 1794.9         | 29.6                             | 1812.7    | 34.0                             | 1654      | 21                                | 1654      | 21       | 3.11      | 1.9                       | 1034     | 0.8                       | 3.11     | 1.9                | 1016     | 1.1                | 4.50     | 2.2                | 3211     | 1.9                | 862      |             |
| 437-20.1            | 0.24  | 167              | 67       | 0.41      | 1325.3         | 23.4                             | 1320.9    | 24.9                             | 1389      | 23                                | 1389      | 23       | 4.37      | 2.0                       | 0903     | 1.1                       | 4.38     | 2.0                | 0883     | 1.2                | 2.78     | 2.3                | 2283     | 2.0                | 840      |             |
| 437-21.1            | 0.00  | 1787             | 389      | 0.22      | 1463.6         | 22.9                             | 1473.0    | 25.0                             | 1345      | 14                                | 1345      | 14       | 3.92      | 1.7                       | 0863     | 0.7                       | 3.92     | 1.7                | 0863     | 0.7                | 3.03     | 1.9                | 2549     | 1.7                | 923      |             |
| 437-22.1            | 1.37  | 912              | 168      | 1.16      | 120.4          | 3.4                              | 120.5     | 3.2                              |           |                                   | 120.5     | 3.2      | 52.31     | 2.7                       | 0960     | 5.3                       | 53.03    | 2.9                | 0481     | 20.2               | 0.13     | 20.4               | 0189     | 2.9                | 141      |             |
| 437-23.1            | 0.07  | 812              | 620      | 0.66      |                |                                  |           |                                  | 1388      | 12                                | 1388      | 12       | 1.61      | 1.9                       | 0988     | 0.5                       | 1.61     | 1.9                | 0983     | 0.6                | 7.56     | 2.0                | 6211     | 1.9                | 951      |             |
| 437-24.1            | 0.00  | 462              | 196      | 0.44      | 76.2           | 1.7                              | 75.8      | 1.7                              |           |                                   | 75.8      | 1.7      | 84.15     | 2.3                       | 0517     | 4.8                       | 84.15    | 2.3                | 0517     | 4.8                | 0.08     | 5.3                | 0119     | 2.3                | 428      |             |
| 437-25.1            | 1.30  |                  | 144      | 1.39      | 115.4          | 3.5                              | 114.3     | 3.5                              |           |                                   | 114.3     | 3.5      | 54.63     | 3.0                       | 0685     | 5.8                       | 55.35    | 3.1                | 0573     | 12.6               | 0.14     | 12.9               | 0181     | 3.1                | 239      |             |
| 437-26.1            | 1.44  | 421              | 357      | 1.75      | 114.2          | 1.7                              | 114.2     | 1.7                              |           |                                   | 114.2     | 1.7      | 30.36     | 2.5                       | 0347     | 3.3                       | 30.36    | 2.5                | 0347     | 3.3                | 0.05     | 30.9               | 0114     | 2.5                | 062      |             |
| 437-27.1            | 0.00  | 603              | 98       | 0.17      | 370.4          | 6.9                              | 350.9     | 7.0                              | 1631      | 32                                | 1631      | 32       | 16.91     | 1.9                       | 1004     | 1.7                       | 16.91    | 1.9                | 1004     | 1.7                | 0.82     | 2.6                | 0591     | 1.9                | 739      |             |
| 437-28.1            | -0.59 | 666              | 290      | 0.45      | 87.6           | 1.7                              | 86.9      | 1.7                              |           |                                   | 86.9      | 1.7      | 73.52     | 2.0                       | 0498     | 2.8                       | 73.09    | 2.0                | 0548     | 2.8                | 0.10     | 3.4                | 0137     | 2.0                | 575      |             |
| 437-29.1            | 1.36  | 124              | 14       | 0.26      | 122.0          | 4.2                              | 122.3     | 3.4                              |           |                                   | 122.3     | 3.4      | 2.87      | 2.8                       | 0467     | 38.5                      | 3.4      | 2.87               | 0467     | 38.5               | 0.12     | 38.7               | 0467     | 3.4                | 089      |             |
| 437-30.1            | 5.42  | 615              | 91       | 0.96      | 220.1          | 6.4                              | 214.7     | 5.7                              |           |                                   | 214.7     | 5.7      | 27.23     | 2.5                       | 1179     | 2.2                       | 28.79    | 2.9                | 0721     | 20.4               | 0.35     | 20.6               | 0347     | 2.9                | 143      |             |
| 437-31.1            | 0.15  | 124              | 14       | 0.15      | 99.0           | 2.0                              | 99.0      | 2.0                              |           |                                   | 99.0      | 2.0      | 64.44     | 2.0                       | 0500     | 2.9                       | 64.54    | 2.1                | 0487     | 9.4                | 0.10     | 9.6                | 0155     | 2.1                | 215      |             |
| 437-32.1            | -0.05 | 195              | 136      | 0.18      | 1086.6         | 19.4                             | 1090.6    | 20.4                             | 1107      | 48                                | 1107      | 48       | 5.44      | 2.0                       | 0764     | 2.4                       | 5.44     | 2.0                | 0764     | 2.4                | 3.1      | 1.94               | 0170     | 2.0                | 635      |             |
| 437-33.1            | -0.45 | 327              | 150      | 0.47      | 1877.3         | 29.8                             | 1896.8    | 34.8                             | 1740      | 13                                | 1740      | 13       | 2.96      | 1.8                       | 1061     | 0.6                       | 2.96     | 1.8                | 1065     | 0.7                | 4.96     | 2.0                | 3381     | 1.8                | 932      |             |
| 437-34.1            | -0.08 |                  | 404      | 0.61      | 373.5          | 9.3                              | 366.2     | 9.3                              | 965       | 55                                | 965       | 55       | 16.68     | 2.5                       | 0753     | 2.4                       | 16.76    | 2.6                | 0713     | 2.7                | 0.59     | 3.7                | 0586     | 2.6                | 685      |             |
| 437-35.1            | -1.56 | 120              | 49       | 0.25      | 106.56         | 2.5                              | 106.56    | 2.5                              |           |                                   | 106.56    | 2.5      | 2.7       | 2.7                       | 0603     | 5.1                       | 2.7      | 2.7                | 0603     | 5.1                | 0.43     | 3.0                | 0430     | 2.7                | 190      |             |
| 437-36.1            | -0.64 | 135              | 43       | 0.33      | 218.4          | 6.1                              | 212.1     | 5.3                              |           |                                   | 212.1     | 5.3      | 29.79     | 2.5                       | 0533     | 4.7                       | 29.02    | 2.8                | 0756     | 15.6               | 0.36     | 15.8               | 0345     | 2.8                | 179      |             |
| 437-37.1            | -4.70 | 322              | 209      | 0.67      | 51.8           | 1.9                              | 40.5      | 1.6                              |           |                                   | 40.5      | 1.6      | 129.85    | 2.7                       | 0251     | 4.0                       | 124.02   | 3.7                | 0370     | 8.4                | 0.26     | 9.2                | 0081     | 3.7                | 406      |             |
| 437-38.1            | 3.34  |                  | 239      | 3.75      | 259.3          | 7.5                              | 255.5     | 6.5                              |           |                                   | 255.5     | 6.5      | 23.55     | 2.5                       | 0896     | 2.4                       | 24.36    | 3.1                | 0810     | 25.9               | 0.35     | 26.9               | 0411     | 3.1                | 118      |             |
| 437-39.1            | 7.77  | 217              | 77       | 0.37      | 51.8           | 2.6                              | 50.7      | 1.9                              |           |                                   | 50.7      | 1.9      | 119.22    | 3.5                       | 0974     | 6.1                       | 124.02   | 5.1                | 0645     | 49.4               | 0.07     | 49.7               | 0081     | 5.1                | 102      |             |
| 437-40.1            | 2.93  | 277              | 195      | 0.73      | 2468.0         | 22.7                             | 2468.3    | 29.4                             | 2665      | 8                                 | 2665      | 8        | 2.14      | 1.1                       | 1816     | 0.5                       | 2.14     | 1.1                | 1813     | 0.5                | 11.66    | 1.2                | 4684     | 1.1                | 912      |             |
| 437-41.1            | 1.11  | 187              | 111      | 0.87      | 18.2           | 1.8                              | 18.2      | 1.8                              |           |                                   | 18.2      | 1.8      | 3.8       | 1.0                       | 1026     | 3.6                       | 3.8      | 1.0                | 1026     | 3.6                |          |                    | 0075     |                    | 3.6      |             |
| 437-42.1            | 4.22  | 986              | 269      | 0.28      | 2178.9         | 10.9                             | 2180.3    | 16.6                             | 2532      | 12                                | 2532      | 12       | 2.49      | 0.6                       | 1674     | 0.7                       | 2.49     | 0.6                | 1674     | 0.7                | 0.28     | 0.9                | 4021     | 0.6                | 639      |             |
| 437-43.1            | 0.23  | 1955             | 1449     | 0.77      | 48.6           | 0.3                              | 48.0      | 0.3                              |           |                                   | 48.0      | 0.3      | 133.53    | 0.7                       | 0487     | 2.5                       | 132.18   | 0.7                | 0567     | 2.9                | 0.08     | 3.0                | 0076     | 0.7                | 232      |             |
| 437-44.1            | 0.29  | 184              | 390      | 0.29      | 140.0          | 0.9                              | 140.0     | 0.9                              |           |                                   | 140.0     | 0.9      | 142.52    | 2.0                       | 0303     | 5.3                       | 140.57   | 2.3                | 0447     | 20.4               | 0.04     | 20.5               | 0068     | 2.3                | 111      |             |
| 437-45.1            | 0.44  | 313              | 131      | 0.43      | 150.0          | 1.8                              | 149.8     | 1.8                              |           |                                   | 149.8     | 1.8      | 42.36     | 1.2                       | 0526     | 3.5                       | 42.47    | 1.2                | 0506     | 4.1                | 0.16     | 4.3                | 0235     | 1.2                | 283      |             |
| 437-46.1            | 0.66  | 262              | 104      | 0.74      | 92.9           | 1.6                              | 92.9      | 1.6                              |           |                                   | 92.       |          |           |                           |          |                           |          |                    |          |                    |          |                    |          |                    |          |             |

Table DR-5 SHRIMP Detrital Zircon U-Pb ages page 2

|          |       |      |     |      |        |      |        |      |       |       |       |       |        |       |        |       |       |      |       |       |       |      |       |     |     |
|----------|-------|------|-----|------|--------|------|--------|------|-------|-------|-------|-------|--------|-------|--------|-------|-------|------|-------|-------|-------|------|-------|-----|-----|
| 440-9.1  | 2.13  | 206  | 145 | 0.73 | 73.0   | 2.3  | 73.7   | 2.3  | 2.3   | 85.94 | 3.1   | .0583 | 6.9    | 87.81 | 3.1    | .0397 | 12.2  | 0.06 | 12.6  | .0114 | 3.1   | 250  |       |     |     |
| 440-10.1 | 0.10  | 131  | 51  | 0.48 | 119.85 | 3.6  | 119.5  | 3.6  | 118.5 | 3.0   | .0597 | 5.3   | 53.24  | 3.0   | .0593  | 6.3   | 0.15  | 7.0  | .0108 | 3.0   | 429   |      |       |     |     |
| 440-11.1 | -0.06 | 907  | 127 | 0.14 | 801.1  | 13.7 | 782.8  | 13.9 | 737   | 16    | .0585 | 7.0   | 7.56   | 1.8   | .0860  | 0.8   | 1.57  | 2.0  | 1323  | 1.8   | 909   |      |       |     |     |
| 440-12.1 | 0.02  | 509  | 138 | 0.28 | 1288.1 | 21.3 | 1282.4 | 22.6 | 1375  | 20    | .0879 | 1.0   | 4.52   | 1.8   | .0877  | 1.0   | 2.67  | 2.1  | 2242  | 1.8   | 869   |      |       |     |     |
| 440-13.1 | 0.00  | 49   | 167 | 0.51 | 167.55 | 5.0  | 165.6  | 5.1  | 165.6 | 5.1   | .0594 | 3.0   | 37.39  | 3.0   | .0594  | 3.0   | 7.22  | 7.0  | 0.223 | 3.0   | 437   |      |       |     |     |
| 440-14.1 | -0.15 | 209  | 62  | 0.31 | 155.0  | 3.8  | 153.8  | 3.8  | 153.8 | 3.8   | .0551 | 4.6   | 41.08  | 2.5   | .0564  | 5.1   | 0.19  | 5.7  | .0243 | 2.5   | 433   |      |       |     |     |
| 440-15.1 | 2.80  | 272  | 162 | 0.62 | 76.1   | 2.0  | 77.6   | 2.0  | 77.6  | 2.0   | .0566 | 5.2   | 84.21  | 2.6   | .0309  | 14.9  | 0.05  | 15.2 | .0119 | 2.6   | 172   |      |       |     |     |
| 440-16.1 | 1.67  | 78   | 133 | 0.47 | 133.41 | 4.4  | 133.41 | 4.3  | 134.1 | 4.3   | .0407 | 1.1   | 43.71  | 1.1   | .0407  | 1.1   | 5.26  | 1.8  | .0218 | 3.3   | 168   |      |       |     |     |
| 440-17.1 | 0.76  | 78   | 29  | 0.40 | 180.0  | 5.5  | 178.0  | 5.5  | 178.0 | 5.5   | .0552 | 6.7   | 35.31  | 3.1   | .0597  | 7.9   | 0.23  | 8.5  | .0283 | 3.1   | 362   |      |       |     |     |
| 440-18.1 | 0.61  | 565  | 79  | 0.14 | 71.5   | 1.8  | 71.7   | 1.8  | 71.7  | 1.8   | .0503 | 4.5   | 89.71  | 2.6   | .0449  | 8.1   | 0.07  | 8.6  | .0111 | 2.6   | 304   |      |       |     |     |
| 440-19.1 | 1.47  | 285  | 84  | 0.31 | 143.2  | 3.3  | 147.8  | 3.3  | 147.8 | 3.3   | .0513 | 3.8   | 43.90  | 2.3   | .0384  | 11.4  | 0.12  | 11.6 | .0228 | 2.3   | 186   |      |       |     |     |
| 440-20.1 | 1.47  | 89   | 248 | 0.48 | 310.4  | 7.1  | 308.8  | 7.2  | 308.8 | 7.2   | .0590 | 3.7   | 20.27  | 2.3   | .0571  | 4.2   | 0.39  | 4.8  | .0443 | 2.3   | 485   |      |       |     |     |
| 440-21.1 | 0.40  | 324  | 92  | 0.29 | 118.8  | 3.1  | 119.2  | 3.0  | 119.2 | 3.0   | .0533 | 2.5   | .0492  | 4.3   | 53.75  | 2.7   | .0458 | 15.8 | 0.12  | 16.1  | 0186  | 2.7  | 166   |     |     |
| 440-22.1 | 2.28  | 289  | 107 | 0.39 | 109.2  | 2.7  | 111.4  | 2.6  | 111.4 | 2.6   | .0529 | 4.8   | 58.52  | 2.5   | .0307  | 27.1  | 0.07  | 27.2 | .0171 | 2.5   | 091   |      |       |     |     |
| 440-23.1 | 0.05  | 994  | 207 | 0.22 | 1121.5 | 18.5 | 1114.2 | 19.3 | 1122  | 21    | .0521 | 1.1   | 5.26   | 1.8   | .0827  | 1.1   | 2.17  | 2.1  | 1900  | 1.8   | 853   |      |       |     |     |
| 440-24.1 | 2.62  | 67   | 30  | 0.46 | 287.5  | 9.1  | 271.4  | 8.0  | 271.4 | 8.0   | .0529 | 2.9   | .0616  | 5.6   | 23.80  | 3.5   | .0386 | 43.8 | 0.23  | 44.0  | 0424  | 3.5  | 079   |     |     |
| 440-25.1 | 0.78  | 390  | 136 | 0.47 | 84.6   | 1.8  | 84.1   | 1.7  | 84.1  | 1.7   | .0617 | 5.3   | 99.25  | 2.8   | .0549  | 15.0  | 0.08  | 15.3 | .0101 | 2.8   | 183   |      |       |     |     |
| 440-26.1 | 1.67  | 475  | 237 | 0.52 | 88.4   | 1.6  | 89.1   | 1.6  | 89.1  | 1.6   | .0535 | 4.0   | 93.76  | 2.4   | .0388  | 21.1  | 0.06  | 21.3 | .0107 | 2.4   | 114   |      |       |     |     |
| 440-28.1 | 0.09  | 425  | 81  | 0.20 | 1782.3 | 29.2 | 1786.3 | 33.1 | 1752  | 15    | .0521 | 1.5   | 3.14   | 1.9   | .1072  | 0.8   | 4.71  | 2.0  | 3185  | 1.9   | 919   |      |       |     |     |
| 440-27.1 | 0.00  | 1075 | 321 | 0.31 | 1525.8 | 24.2 | 1515.7 | 25.2 | 1632  | 8     | .0535 | 1.6   | 3.74   | 1.8   | .1005  | 0.4   | 3.74  | 1.8  | .1004 | 0.4   | 370   |      |       |     |     |
| 440-29.1 | 0.12  | 209  | 91  | 0.45 | 70.9   | 2.7  | 69.6   | 2.5  | 69.6  | 2.5   | .0529 | 3.5   | .0649  | 6.5   | 80.40  | 3.8   | .0539 | 20.4 | 0.10  | 20.7  | 0111  | 3.8  | 185   |     |     |
| 440-29.1 | 0.35  | 232  | 73  | 0.32 | 117.7  | 3.4  | 118.1  | 3.3  | 118.1 | 3.3   | .0548 | 2.8   | .0578  | 4.5   | 54.27  | 2.9   | .0452 | 16.3 | 0.11  | 16.5  | 0184  | 2.9  | 174   |     |     |
| 440-30.1 | -3.22 | 368  | 199 | 0.56 | 50.6   | 1.6  | 48.3   | 1.3  | 48.3  | 1.3   | .0300 | 2.7   | .0603  | 5.6   | 126.82 | 3.2   | .0870 | 18.0 | 0.09  | 18.5  | 0179  | 3.2  | 176   |     |     |
| 440-31.1 | 2.38  | 198  | 62  | 0.43 | 48.0   | 1.8  | 47.9   | 1.7  | 47.9  | 1.7   | .0352 | 3.4   | .0703  | 7.2   | 133.69 | 3.7   | .0497 | 25.3 | 0.05  | 25.6  | 0075  | 3.7  | 144   |     |     |
| 440-32.1 | 1.11  | 51   | 51  | 0.47 | 98.7   | 3.5  | 98.3   | 3.3  | 98.3  | 3.3   | .0298 | 3.2   | .0762  | 11.2  | 64.79  | 3.6   | .0521 | 31.1 | 0.11  | 31.3  | 0134  | 3.6  | 114   |     |     |
| 440-33.1 | 1.13  | 398  | 198 | 0.63 | 148.8  | 3.9  | 148.2  | 3.6  | 149.2 | 3.6   | .0537 | 3.6   | 42.33  | 2.4   | .0567  | 3.6   | 42.82 | 2.7  | .0469 | 19.8  | 0.15  | 20.0 | 0254  | 2.7 | 133 |
| 440-34.1 | 0.03  | 213  | 173 | 0.84 | 1483.8 | 29.2 | 1483.8 | 29.2 | 1640  | 23    | .0521 | 3.2   | 3.82   | 2.0   | .1011  | 1.0   | 3.83  | 2.0  | .1009 | 1.2   | 3.63  | 2.4  | 2614  | 2.0 | 886 |
| 440-35.1 | 0.55  | 394  | 169 | 0.44 | 150.2  | 3.3  | 150.7  | 3.3  | 150.7 | 3.3   | .0510 | 3.6   | 42.41  | 2.2   | .0462  | 4.8   | 4.8   | 0.15 | 5.3   | .0236 | 2.2   | 423  | 2.2   | 423 |     |
| 440-36.1 | 0.29  | 191  | 87  | 0.38 | 103.6  | 3.1  | 102.0  | 2.8  | 102.0 | 2.8   | .0547 | 5.9   | 61.71  | 3.0   | .0616  | 18.7  | 0.14  | 18.9 | .0162 | 3.0   | 157   |      |       |     |     |
| 440-37.1 | 0.45  | 236  | 105 | 0.50 | 7.0    | 1.1  | 380.7  | 7.1  | 380.7 | 7.1   | .0527 | 3.9   | 19.47  | 1.9   | .0666  | 1.9   | 19.47 | 1.9  | .0666 | 1.9   | 19.47 | 1.9  | 487   |     |     |
| 440-38.1 | 0.00  | 2030 | 358 | 0.18 | 119.3  | 2.2  | 117.5  | 2.2  | 117.5 | 2.2   | .0511 | 1.5   | 53.55  | 1.9   | .0611  | 1.5   | 0.16  | 2.4  | .0187 | 1.9   | 727   |      |       |     |     |
| 440-39.1 | 0.53  | 1220 | 656 | 0.56 | 46.3   | 0.6  | 46.3   | 0.6  | 46.3  | 0.6   | .0508 | 2.8   | 138.72 | 1.3   | .0482  | 5.7   | 0.05  | 5.9  | .0172 | 1.3   | 227   |      |       |     |     |
| 440-40.1 | 0.26  | 91   | 66  | 0.18 | 86.26  | 1.2  | 85.9   | 1.2  | 85.9  | 1.2   | .0543 | 4.4   | 74.29  | 1.4   | .0481  | 4.8   | 0.48  | 4.8  | .0134 | 4.4   | 283   |      |       |     |     |
| 440-41.1 | 0.10  | 279  | 122 | 0.45 | 82.8   | 1.6  | 81.8   | 1.4  | 81.8  | 1.4   | .0599 | 4.4   | 77.33  | 1.9   | .0590  | 12.0  | 0.11  | 12.1 | .0129 | 1.9   | 155   |      |       |     |     |
| 440-42.1 | 0.00  | 59   | 27  | 0.47 | 395.1  | 7.2  | 392.3  | 7.4  | 392.3 | 7.4   | .0509 | 4.2   | 15.82  | 1.9   | .0609  | 4.2   | 0.33  | 4.6  | .0632 | 1.9   | 408   |      |       |     |     |
| 440-43.1 | 1.21  | 123  | 62  | 0.52 | 100.2  | 1.6  | 100.5  | 1.5  | 100.5 | 1.5   | .0536 | 3.5   | 63.86  | 1.6   | .0451  | 11.0  | 0.10  | 11.2 | .0137 | 1.6   | 143   |      |       |     |     |
| 440-44.1 | 0.12  | 663  | 135 | 0.21 | 471.0  | 4.2  | 452.5  | 4.7  | 1448  | 18    | .0521 | 0.7   | 13.19  | 0.9   | .0911  | 0.9   | 0.95  | 1.3  | .0758 | 0.9   | 704   |      |       |     |     |
| 440-45.1 | 2.34  | 106  | 34  | 0.33 | 186.6  | 3.1  | 189.8  | 3.1  | 189.8 | 3.1   | .0556 | 3.7   | 34.04  | 1.7   | .0350  | 15.5  | 0.14  | 15.6 | .0294 | 1.7   | 108   |      |       |     |     |
| 440-46.1 | 0.00  | 101  | 101 | 0.47 | 1.4    | 1.7  | 1.4    | 1.7  | 1.4   | 1.7   | .0535 | 1.7   | 1.4    | 1.7   | .0350  | 1.7   | 1.4   | 1.7  | .0350 | 1.7   | 1.4   | 1.7  | 1.4   | 1.7 |     |
| 440-47.1 | -0.29 | 126  | 57  | 0.46 | 73.5   | 1.5  | 71.3   | 1.5  | 71.3  | 1.5   | .0548 | 2.0   | .0709  | 5.1   | 87.23  | 5.0   | .012  | 5.4  | .0115 | 5.0   | 2.0   | 387  |       |     |     |
| 440-48.1 | 1.77  | 177  | 77  | 0.46 | 111.5  | 1.8  | 112.1  | 1.8  | 112.1 | 1.8   | .0553 | 3.8   | 57.34  | 1.7   | .0433  | 13.0  | 0.10  | 13.1 | .0174 | 1.7   | 120   |      |       |     |     |
| 440-49.1 | 1.44  | 137  | 44  | 0.53 | 27.7   | 0.7  | 27.7   | 0.7  | 27.7  | 0.7   | .0541 | 6.1   | 35.79  | 1.6   | .0517  | 10.8  | 0.10  | 10.8 | .0278 | 1.6   | 149   |      |       |     |     |
| 440-50.1 | 3.46  | 208  | 110 | 0.50 | 91.4   | 1.4  | 92.8   | 1.5  | 92.8  | 1.5   | .0564 | 3.5   | 70.03  | 1.6   | .0349  | 14.5  | 0.07  | 14.6 | .0143 | 1.6   | 108   |      |       |     |     |
| 440-51.1 | 0.00  | 85   | 33  | 0.41 | 97.2   | 2.1  | 95.0   | 2.1  | 95.0  | 2.1   | .0677 | 5.4   | 65.79  | 2.2   | .0677  | 5.4   | 0.14  | 5.8  | .0152 | 2.2   | 379   |      |       |     |     |
| 440-52.1 | 1.58  | 103  | 51  | 0.41 | 77.8   | 1.2  | 77.8   | 1.2  | 77.8  | 1.2   | .0570 | 1.7   | 82.79  | 1.7   | .0432  | 16.3  | 0.17  | 16.3 | .0137 | 1.7   | 095   |      |       |     |     |
| 440-53.1 | 3.25  | 88   | 48  | 0.56 | 152.8  | 3.4  | 156.3  | 3.8  | 156.3 | 3.8   | .0575 | 4.3   | 41.70  | 2.3   | .0286  | 44.8  | 0.09  | 44.9 | .0240 | 2.3   | 050   |      |       |     |     |
| 440-54.1 | -0.05 | 194  | 217 | 1.15 | 1605.9 | 14.5 | 1605.3 | 16.0 | 1611  | 14    | .0599 | 0.7   | 3.53   | 1.0   | .0993  | 0.8   | 3.87  | 1.3  | .0829 | 1.0   | 804   |      |       |     |     |
| 440-55.1 | 0.00  | 113  | 30  | 0.28 | 325.7  | 4.7  | 325.3  | 4.5  | 325.3 | 4.5   | .0591 | 1.4   | 19.30  | 1.5   | .0457  | 11.3  | 0.11  | 11.3 | .0618 | 1.5   | 132   |      |       |     |     |
| 440-56.1 | 0.64  | 279  | 146 | 0.54 | 192.5  | 2.3  | 193.6  | 2.3  | 193.6 | 2.3   | .0508 | 3.8   | 32.98  | 1.2   | .0452  | 4.8   | 0.19  | 4.9  | .0303 | 1.2   | 240   |      |       |     |     |
| 440-57.1 | 0.00  | 198  | 85  | 0.34 | 114.8  | 1.7  | 114.0  | 1.7  | 114.0 | 1.7   | .0547 | 4.1   | 55.63  | 1.5   | .0547  | 4.1   | 0.14  | 4.4  | .0180 | 1.5   | 345   |      |       |     |     |
| 440-58.1 | 1.78  | 122  | 66  | 0.13 | 89.1   | 1.3  | 89.1   | 1.3  | 89.1  | 1.3   | .0563 | 3.7   | 71.93  | 1.7   | .0366  | 18.9  | 0.17  | 19.0 | .0137 | 1.7   | 087   |      |       |     |     |
| 440-59.1 | 1.01  | 289  | 129 | 0.45 | 88.7   | 1.4  | 89.6   | 1.4  | 89.6  | 1.4   | .0488 | 5.4   | 64.82  | 1.4   | .0399  | 12.8  | 0.08  | 12.9 | .0154 | 1.4   | 029   |      |       |     |     |
| 440-60.1 | 4.91  | 83   | 27  | 0.34 | 150.4  | 3.4  | 156.0  | 3.0  | 156.0 | 3.0   | .0609 | 4.8   | 42.35  | 2.3   | .0167  | 77.6  | 0.05  | 77.7 | .0136 | 2.3   | 111   |      |       |     |     |
| 440-61.1 | 1.11  | 156  | 62  | 0.16 | 82.1   | 1.6  | 81.6   | 1.5  | 81.6  | 1.5   | .0574 | 4.0   | 77.44  | 2.0   | .0387  | 22.9  | 0.10  | 23.0 | .0129 | 2.0   | 087   |      |       |     |     |
| 440-62.1 | -0.01 | 333  | 234 | 0.73 | 161.0  | 1.9  | 160.3  | 1.9  | 160.3 | 1.9   | .0531 | 2.4   | 39.53  | 1.2   | .0531  | 2.4   | 0.19  | 2.7  | .0252 | 1.2   | 444   |      |       |     |     |
| 440-63.1 | 7.58  | 99   | 47  | 0.49 | 46.4   | 2.1  | 49.2   | 1.3  | 49.2  | 1.3   | .0535 | 9.6   | 138.52 | 4.5   | .0403  | 6.6   | 0.09  | 6.7  | .0131 | 4.5   | 187   |      |       |     |     |
| 440-64.1 | 3.90  | 164  | 138 | 0.46 | 104.6  | 1.5  | 105.5  | 1.3  | 105.5 | 1.3   | .0520 | 1.2   | 60.52  | 1.2   | .0540  | 1.3   | 0.13  | 1.3  | .0184 | 1.2   | 33    |      |       |     |     |
| 440-65.1 | 0.01  | 773  | 270 | 0.36 | 1573.1 | 12.3 | 1560.6 | 13.5 | 1697  | 6     | .0521 | 0.9   | 10.40  | 0.3   | .062   | 0.9   | 10.40 | 0.3  | .062  | 0.9   | 10.40 | 0.3  | 934   |     |     |
| 440-66.1 | 1.07  | 553  | 47  | 0.09 | 85.2   | 1.0  | 86.0   | 1.0  | 86.0  | 1.0   | .0434 | 3.5   | 75.14  | 1.2   | .0400  | 9.3   | 0.07  | 9.4  | .0133 | 1.2   | 129   |      |       |     |     |
| 440-67.1 | 0.00  | 104  | 42  | 0.26 | 403.0  | 4.7  | 403.0  | 4.7  | 403.0 | 4.7   | .0552 | 2.2   | 1.46   | 2.2   | .0552  | 2.2   | 1.46  | 2.2  | .0552 | 2.2   | 1.46  | 2.2  | 497</ |     |     |



Table 6 40Ar/39Ar plateau ages for OR-WA Siletz River Volcanics

## Siletz River Volcanics, S. Oregon Coast Range

| <u>Sample</u> | <u>location</u> | <u>longitude ° W</u> | <u>latitude ° N</u> | <u>unit</u> | <u>rock type</u> | <u>plateau age, Ma</u> | <u>± 2sigma</u> | <u>Source</u>    |
|---------------|-----------------|----------------------|---------------------|-------------|------------------|------------------------|-----------------|------------------|
| RB6B          | Roseburg Quarry | 123.28               | 43.23               | SRV         | basalt           | 56.0                   | ± 0.8           | Pyle et al, 2009 |
| DA252a        | Drain anticline | 123.36               | 43.64               | SRV         | subaerial bas.   | 56.0                   | ± 0.6           | Pyle et al, 2009 |
| D78-RB-31     | Sutherlin well  | 123.24               | 43.43               | SRV         | subaerial bas.   | 53.4                   | ± 2.5           | Pyle et al, 2009 |
| RB02-06       | Blue Ridge      | 124.11               | 43.27               | SRV         | basalt           | 53.2                   | ± 0.9           | Pyle et al, 2009 |
| KS-1          | Kentucky slough | 124.09               | 43.45               | SRV         | basalt in tuff   | 53.3                   | ± 0.9           | Pyle et al, 2009 |
| CQ-3          | Coquille        | 124.11               | 43.15               | SRV         | plag sep         | 53.1                   | ± 1.3           | Pyle et al, 2009 |

## Siletz River Volcanics, N. Oregon Coast Range

|            |                   |        |       |           |                 |      |       |                  |
|------------|-------------------|--------|-------|-----------|-----------------|------|-------|------------------|
| SR95-05-04 | Mary's Peak Hy 34 | 123.69 | 44.37 | SRV       | basalt, massive | 53.1 | ± 0.9 | Pyle et al, 2009 |
| SR95-06-11 | Mary's Peak       | 123.55 | 44.50 | SRV       | basalt, pillow  | 53.9 | ± 0.9 | Pyle et al, 2009 |
| SR95-02-09 | upper Siletz      | 123.40 | 45.30 | SRV       | basalt          | 50.6 | ± 0.8 | Pyle et al, 2009 |
| SR95-08-06 | Siletz Gorge      | 123.80 | 44.87 | SRV       | basalt          | 51.0 | ± 0.8 | Pyle et al, 2009 |
| SR95-10-07 | Ball Mtn          | 123.93 | 44.90 | SRV       | plag sep        | 50.1 | ± 2.3 | Pyle et al, 2009 |
| SR95-03-19 | Hembre Ridge      | 123.52 | 45.49 | SRV upper | basalt          | 45.6 | ± 0.9 | Pyle et al, 2009 |
| SR95-04-04 | Alsea Falls       | 123.53 | 44.36 | SRV upper | basalt          | 46.0 | ± 2.0 | Pyle et al, 2009 |
